# Supplementary material for: Near-infrared emissive lanthanide hybridized carbon quantum dots for bioimaging applications
Source: Royal Society of Chemistry journal article supplement (doi:10.1039/c6tb01646d), 2016-01-01
Supplement: c6tb01646d1.pdf [file c6tb01646d1.pdf]

## Supporting Information

### Near-Infrared Emissive Lanthanide Hybridized Carbon Quantum Dots for Bioimaging Applications

Fengshou Wu,<sup>a,b,†</sup> Huifang Su,<sup>c,†</sup> Xunjin Zhu,<sup>\*b</sup> Kai Wang,<sup>a</sup> Zhenfeng Zhang<sup>\*c</sup> and Wai-Kwok Wong<sup>\*b</sup>

<sup>a</sup> Key Laboratory for Green Chemical Process of the Ministry of Education, Wuhan Institute of Technology, Wuhan, P. R. China.

<sup>b</sup> Department of Chemistry, Hong Kong Baptist University, Waterloo Road, Hong Kong, P. R. China.

<sup>c</sup> State Key Laboratory of Oncology in South China, Collaborative Innovation Center for Cancer Medicine, Sun Yet-sen University Cancer Center, Guangzhou, P. R. China.

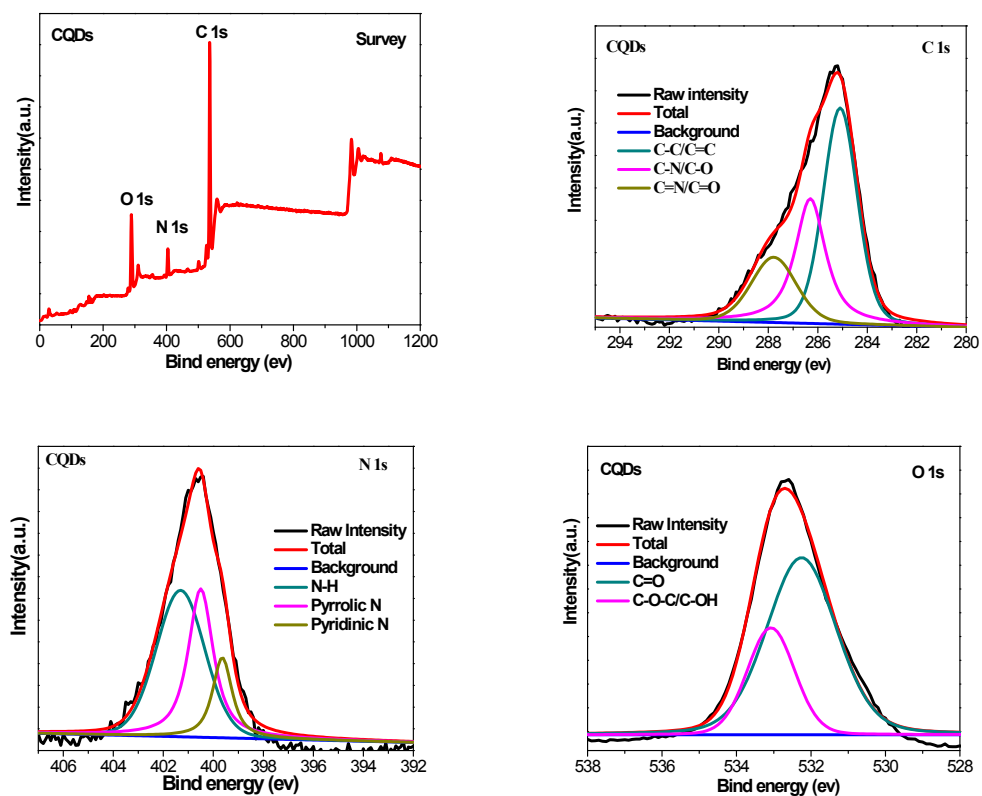

Figure S1. XPS spectra of CQDs

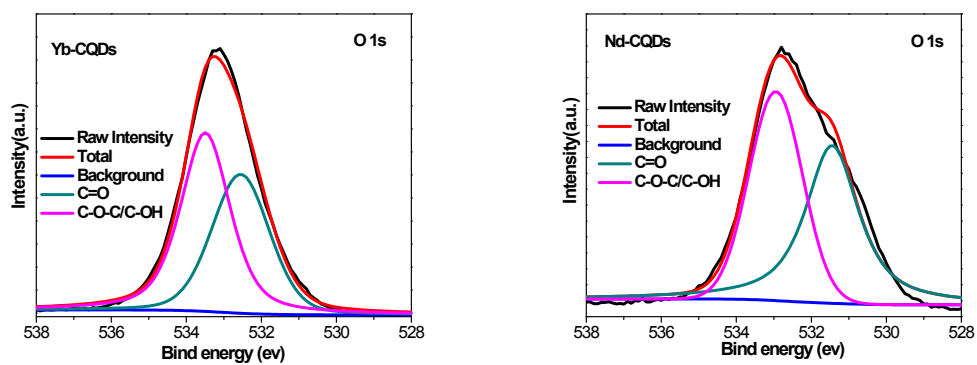

Figure S2. High-resolution XPS spectrum of O1s of Yb-CQDs and Nd-CQDs

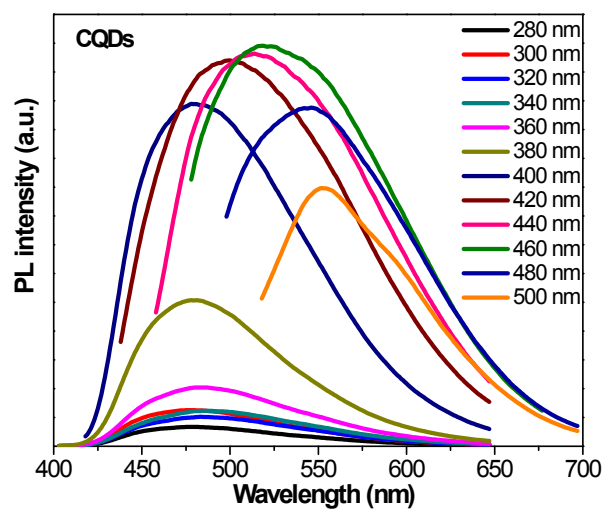

Figure S3. Fluorescence spectra of CQDs with different excitation wavelengths

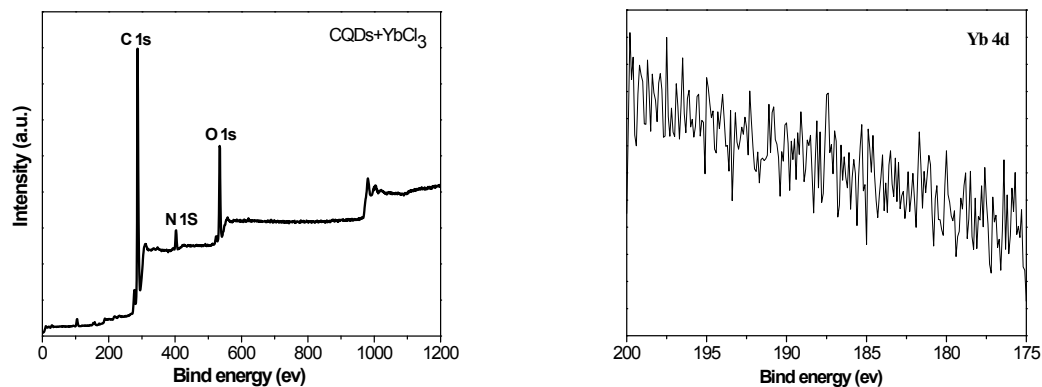

Figure S4. XPS spectra of the control sample of YbCl<sub>3</sub>+CQDs after the dialysis.

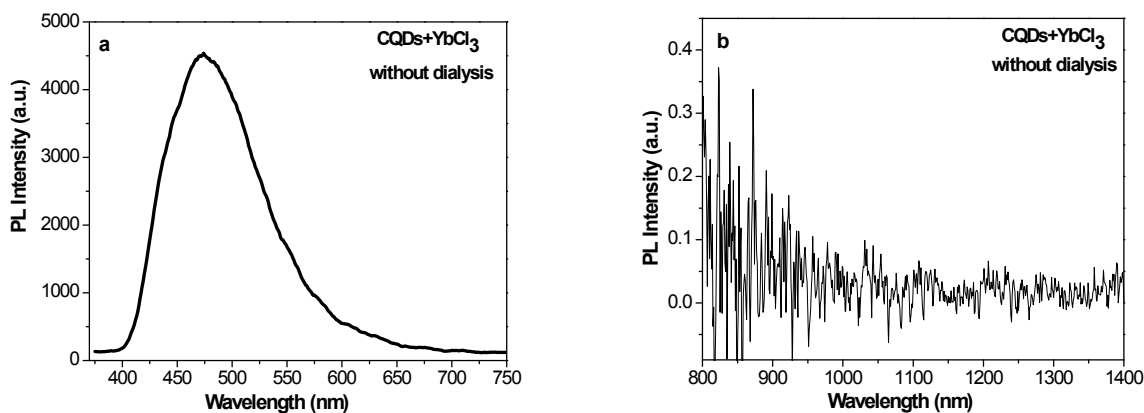

Figure S5. (a) Visible emission spectrum ( $\lambda_{\text{ex}} = 360 \text{ nm}$ ) and (b) NIR emission spectrum of the control sample by directly adding  $\text{YbCl}_3$  into the CQDs solution without dialysis (CQDs+ $\text{YbCl}_3$  without dialysis) ( $\lambda_{\text{ex}} = 420 \text{ nm}$ ).

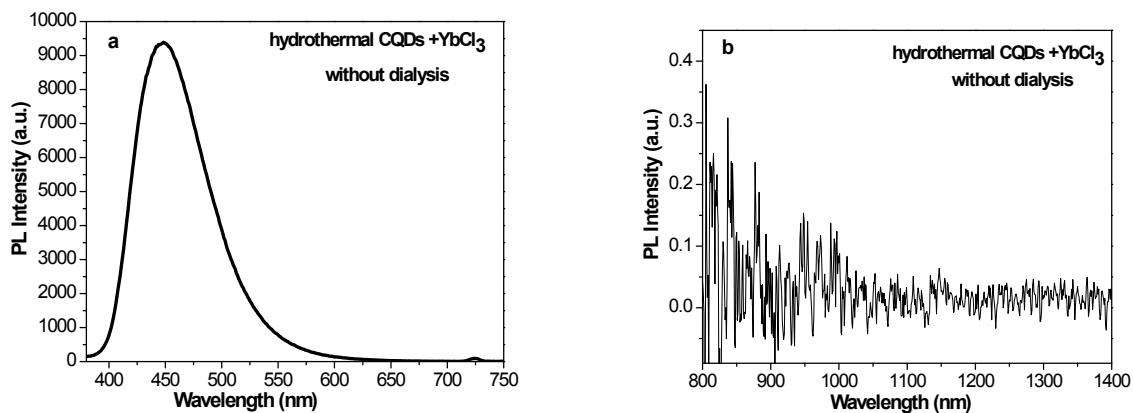

Figure S6. (a) Visible emission spectrum ( $\lambda_{\text{ex}} = 360 \text{ nm}$ ) and (b) NIR emission spectrum of the control sample by hydrothermal  $\text{YbCl}_3$  and CQDs solution (hydrothermal CQDs+ $\text{YbCl}_3$  without dialysis) ( $\lambda_{\text{ex}} = 420 \text{ nm}$ ).

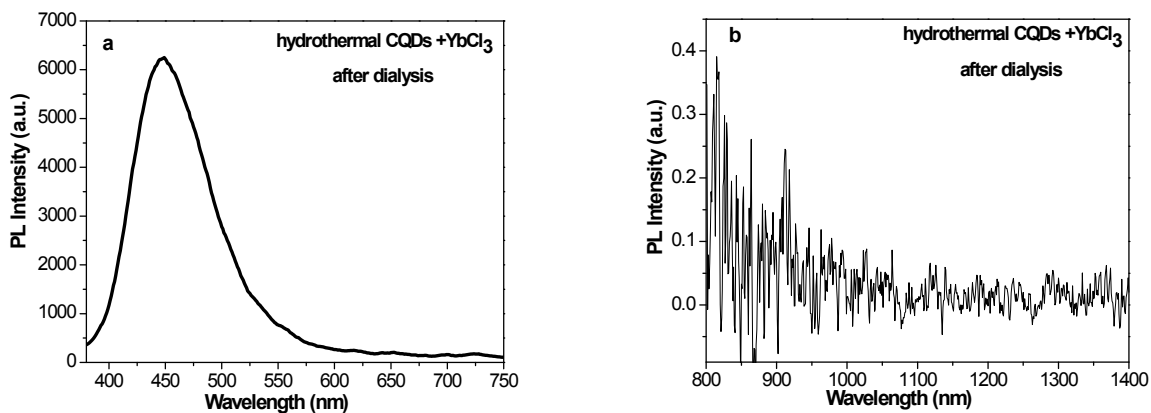

Figure S7. (a) Visible emission spectrum ( $\lambda_{\text{ex}} = 360 \text{ nm}$ ) and (b) NIR emission spectrum of the control sample by hydrothermal  $\text{YbCl}_3$  and CQDs solution and then purified by dialysis (hydrothermal CQDs+ $\text{YbCl}_3$  after dialysis) ( $\lambda_{\text{ex}} = 420 \text{ nm}$ ).

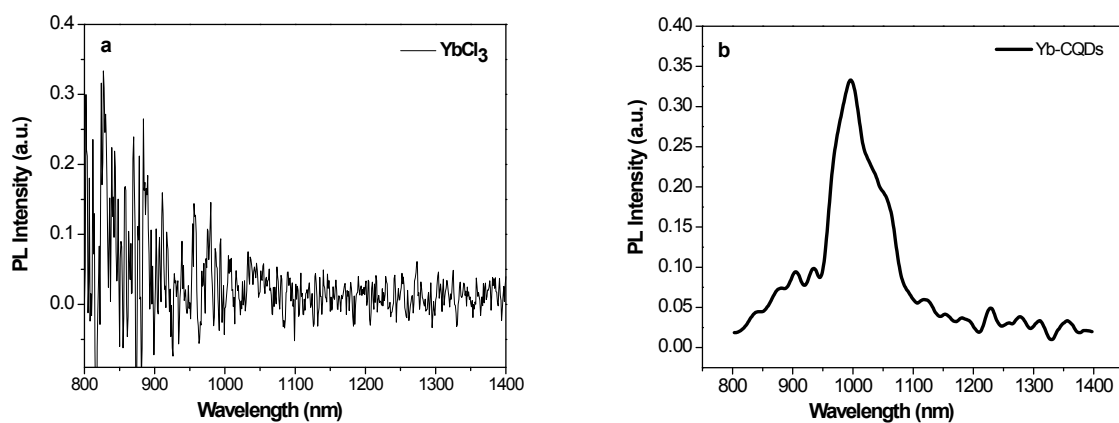

Figure S8. (a) NIR emission spectrum of  $\text{YbCl}_3$  in water ( $\lambda_{\text{ex}} = 360$  nm) and (b) NIR emission spectrum of Yb-CQDs under excitation of 380 nm.
